# Supplementary material for: A Machine Learning Approach for Detecting Wind Farm Noise Amplitude Modulation
Source: Preprints.org preprint supplement (doi:10.20944/preprints202012.0152.v1), 2020-12-07
Supplement: Supplementary file 1 [file supplementary]

# **Supplementary Information for**

## **A machine learning approach for detecting wind farm noise amplitude modulation**

**Duc Phuc Nguyen, Kristy Hansen, Bastien Lechat, Peter Catcheside and Branko Zajamsek**

**Corresponding Duc Phuc Nguyen.**

**E-mail: [ducphuc.nguyen@flinders.edu.au](mailto:ducphuc.nguyen@flinders.edu.au)**

### **This PDF file includes:**

Figs. S1 to S5

Tables S1 to S4

SI References

## Supplementary Methods

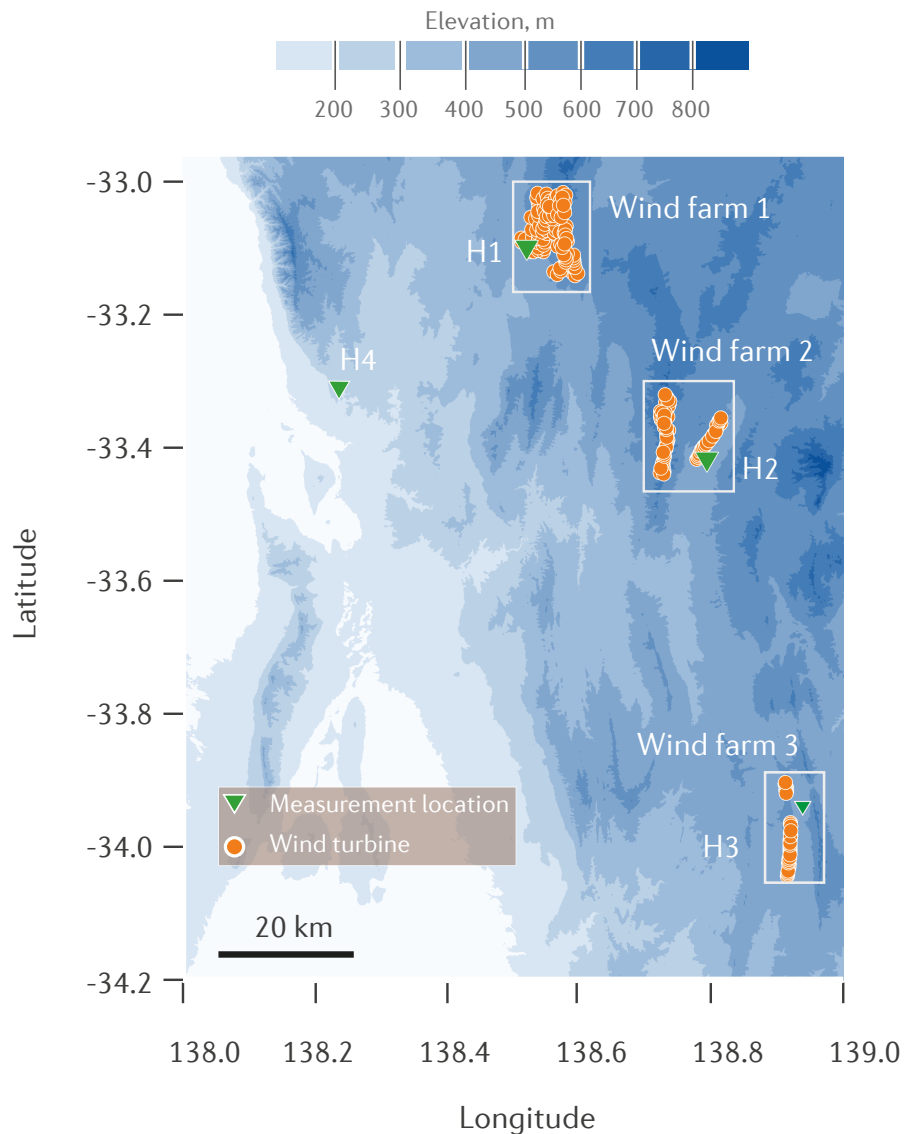

**Fig. S1.** (Color online). Three measurements (H1-H3) located near South Australian wind farms. The data measured at wind farm 1 and 2 were used for training and validating the algorithm. The data measured at wind farm 3 when the wind farm was not operating and at unoccupied residence H4 were used for false positive rate validation. Wind farm 1 comprised 99 Siemens 3.2 MW turbines at the time of the measurements. Wind farm 2 comprised 70 Suzlon 2.1 MW wind turbines. Wind farm 3 was made up of 37 Vestas V90-3.0MW wind turbines. Typical measurement setup: the microphone was positioned at ground level and protected using a hemispherical secondary windshield with a diameter of 450 mm (See Hansen et al. (1) for details). The microphone was typically positioned at least 10 m away from the residence and surrounding vegetation to minimize façade reflections and wind-induced vegetation noise.

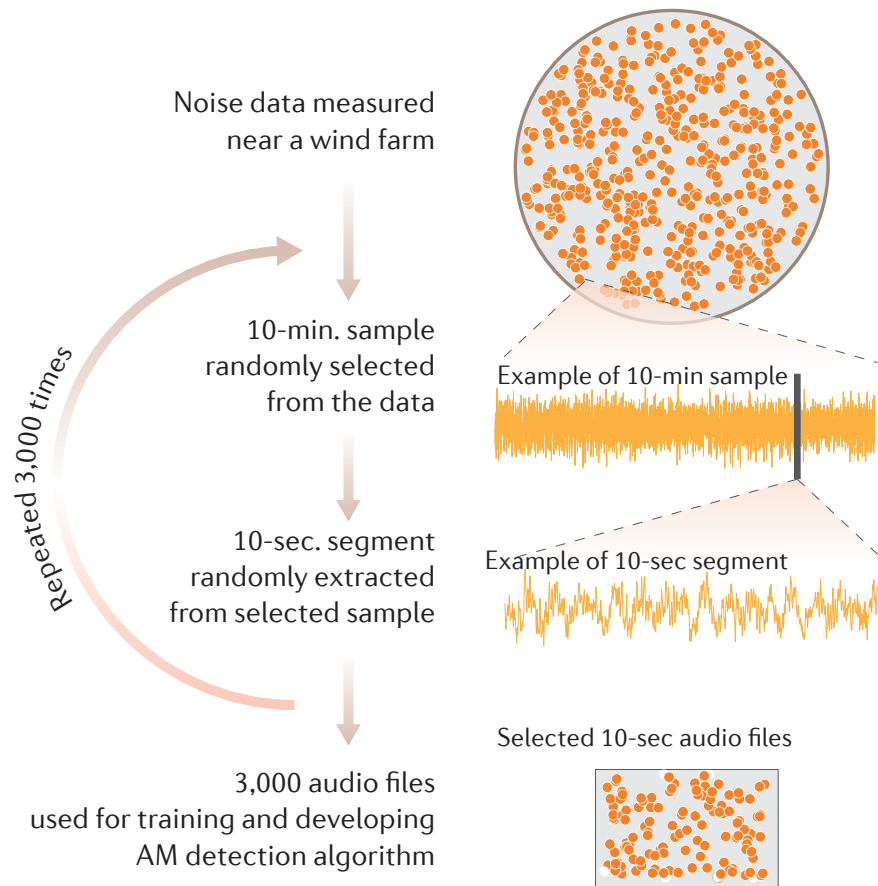

**Fig. S2.** (Color online). For illustration purposes, each orange dot inside the top circle represents a 10-minute sample in a measured data set. To extract 10-second audio files, we randomly selected 3,000 10-minute samples from each data set (data measured at each locations See Fig. S1) using the resampling without replacement technique (i.e., each 10-minute sample has only one chance to be selected in the data set). From each selected sample, a 10-second duration segment was randomly selected then extracted. The segments were then converted to audio files (.wav). Exclusion criteria were not specified for the data extraction (i.e., raining, dogs barking, farming machinery noise etc.)

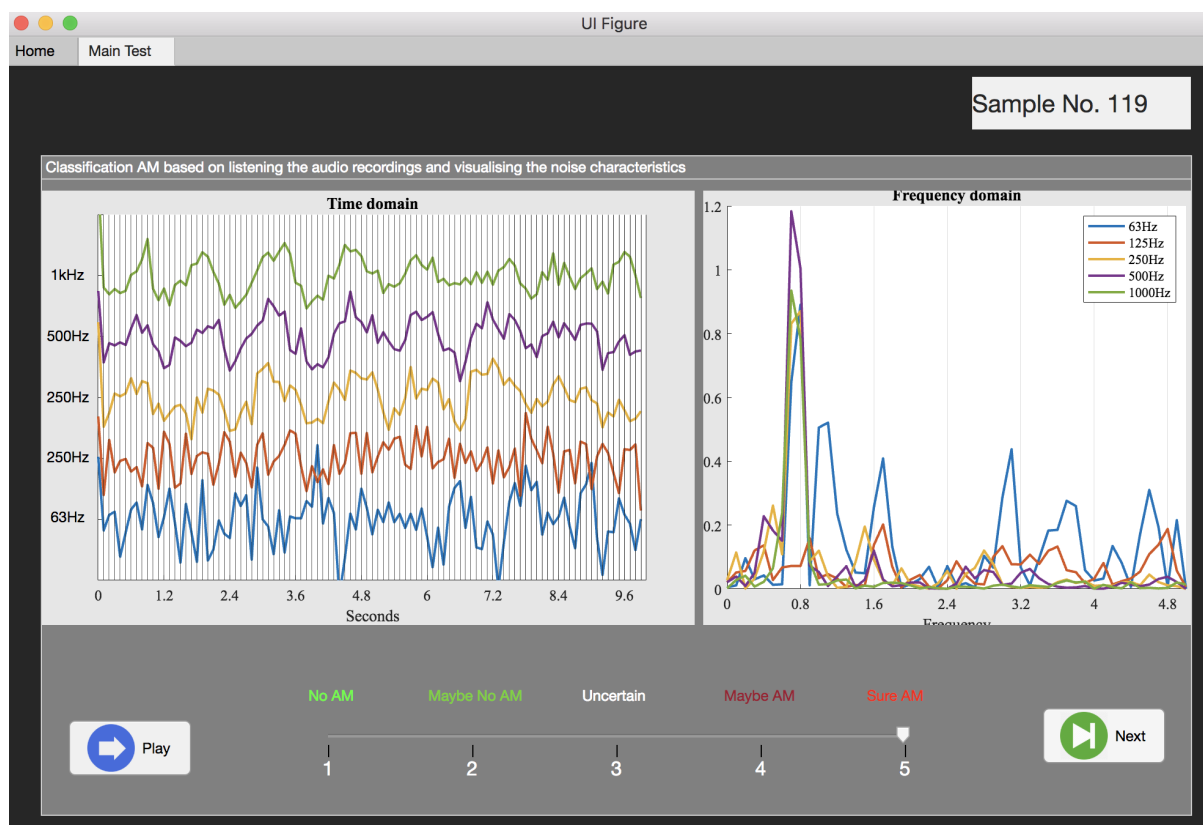

**Fig. S3.** (Color online). MATLAB GUI for rating the presence of amplitude modulation audio files. The chosen example shows the characteristics of an audio sample with broadband amplitude modulation at 250 – 1000 Hz. The octave-band 100 ms fast-weighted SPL in the time and frequency domains was shown during audio presentations as the visual presence of noise characteristics was expected to improve the scorer's sensitivity. It should be noted that the amplitude (y-axis) as shown in the left figure has been normalised for visual inspection purposes. The frequency resolution of the signals in the right figure was 0.1 Hz. Scorers could listen to the audio files multiple times before rating. The experiment required a high concentration on the noise all the time, and thus to mitigate wrong classifications, the scorer was instructed to have break if they could not focus on the noise. To evaluate the inter-scorer agreement, Scorer 2 also listened and rated 100 audio samples, which were selected randomly from the 6,000 audio files. These results were compared with those of Scorer 1 based on the Matthews correlation coefficient metric. It took more than two weeks for Scorer 1 and nearly two days for Scorer 2 to listen and rate the audio files.

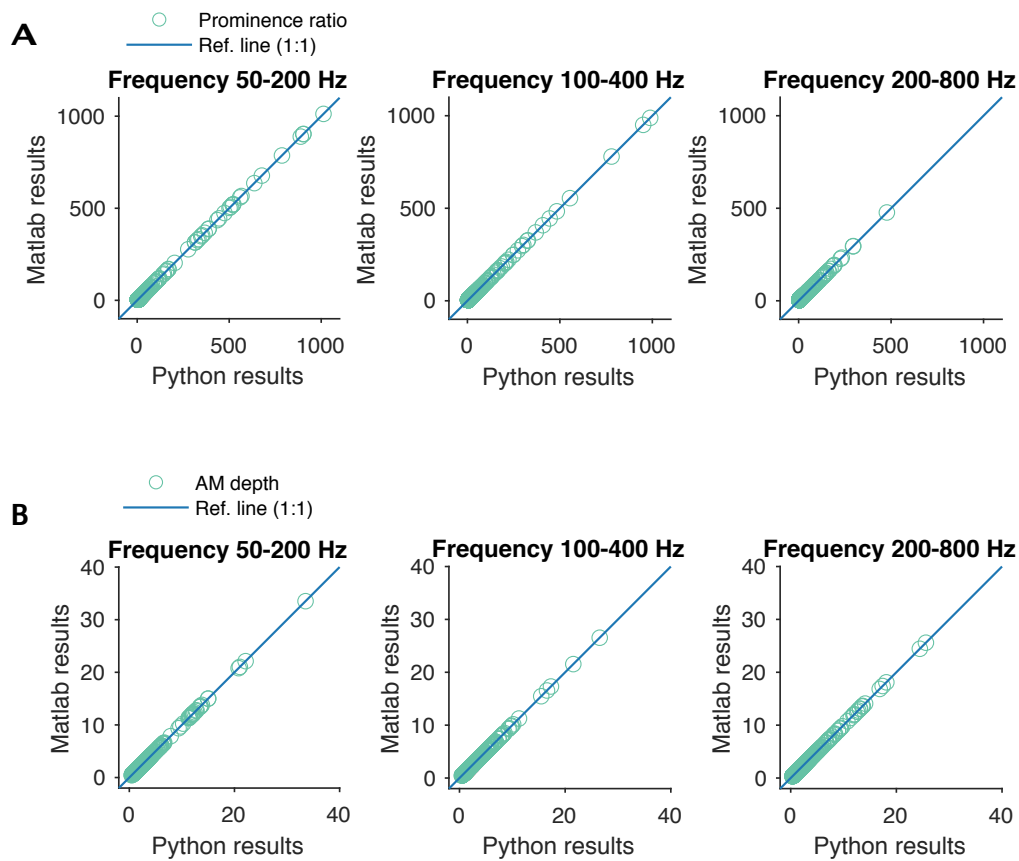

**Fig. S4.** (Color online). Comparison between MATLAB and Python (2) results. **A**, Comparison of prominence ratio (PR) between MATLAB and Python results. **B**, Comparison of AM depth between MATLAB and Python results

---

**Algorithm 1:** Hybrid AM detection algorithm (3)

---

**Data:** 10-second audio files

**Result:** Prominence ratio, present or absent AM

**for** *band-pass filter between ([50-200Hz],[100-400Hz],[100-800Hz])* **do**

- > Apply band-pass filter to the input signals;
  - > Apply the A-weighting filter to the obtained signal;
  - > Calculate the fast (100 *ms*) time-weighted SPL,  $L_{Aeq}(fast)$ ;
  - > Detrend the SPL signal using a third order polynomial curve fit, resulting in  $\Delta LA$ ;
  - > Transform the detrended SPL ( $\Delta LA$ ) to the frequency domain;
  - > Find spectral peaks located in the range of 0.4 to 1.0 Hz;
  - >  $A = \max(\text{peaks})$  in the range [0.4 to 1 Hz];
  - >  $B = \text{mean}(4 \text{ spectral lines})$  which are closest to the max peak location (except the two peaks closest to the max peak);
  - > Calculate the prominence ratio,  $PR = A/B$ ;
  - if**  $PR \geq 4$  **then**
    - | AM present, and the AM depth is calculated ;
  - else**
    - | AM absent;
    - | Go to the end of the loop;
-

---

**Algorithm 2:** Frequency-domain AM detection algorithm (4)

---

**Data:** 10-second audio files

**Result:** AM factor, present or absent AM

> Apply low-pass filter at 1kHz;

> Apply the A-weighting filter;

> Calculate the fast (100ms) time-weighted SPLs,  $L_{Aeq}(fast)$ ;

> Detrend the SPL signal using a third-order polynomial curve fit;

> Transform the detrended SPL to the frequency domain using an FFT;

> Calculate the amplitude modulation spectrum;

$AMS = \sqrt{2} * |FFT(detrendedLA(fast))|/N$ ;

> Calculate the AM factor ;

$AMfactor = max(AMS(f)) \quad with \quad [0.6 \quad 1Hz]$  ;

**if**  $AMfactor \geq 0.4$  **then**

  | AM present ;

**else**

  | AM absent;

---

---

**Algorithm 3:** Time-domain AM detection algorithm (5)

---

**Data:** 10-second audio files

**Result:** DAM

- > Apply low-pass filter at 1kHz;
  - > Apply the A-weighting filter;
  - > Calculate slow (1s) and fast (100ms) time-weighted SPLs,  $L_{Aeq}(slow)$  and  $L_{Aeq}(fast)$ ;
  - > Detrend the SPL signal:  $\Delta LA = L_{Aeq}(fast) - L_{Aeq}(slow)$ ;
  - > Calculate the 95<sup>th</sup> and 5<sup>th</sup> percentiles of  $\Delta LA$  ;
  - >  $DAM = \Delta LA_5 - \Delta LA_{95}$ ;
-



| No.   | Type                          | Feature (description)                                                                                                                                                                                                                                                                                                                                                                                                           | Ref.     |
|-------|-------------------------------|---------------------------------------------------------------------------------------------------------------------------------------------------------------------------------------------------------------------------------------------------------------------------------------------------------------------------------------------------------------------------------------------------------------------------------|----------|
| 1-11  | Spectrum shape-based features | <i>spectralCentroid</i><br><i>spectralCrest</i><br><i>spectralDecrease</i><br><i>spectralEntropy</i><br><i>spectralFlatness</i><br><i>SpectralFlux</i><br><i>spectralKurtosis</i><br><i>spectralRollofPoint</i><br><i>spectralSkewness</i><br><i>spectralSlope</i><br><i>spectralSpread</i>                                                                                                                                     | (6, 7)   |
| 12-13 | Tonality based-features       | <i>pitch</i><br><i>harmonicratio</i>                                                                                                                                                                                                                                                                                                                                                                                            | (6, 7)   |
| 14-17 | Overall noise features        | <i>LA</i> (LAeq)<br><i>ratioLGLA</i> (LGeq/LAeq)<br><i>ratioLCLA</i> (LCeq/LAeq)<br><i>diffLCLA</i> (LCeq-LAeq)                                                                                                                                                                                                                                                                                                                 | (8)      |
| 18-27 | Time domain features          | <i>peakLoc</i> (Peak location)<br><i>peakVal</i> (Peak value)<br><i>posSlope</i> (Mean positive slope)<br><i>negSlope</i> (Mean negative slope)<br><i>peakloc_unweightedSPL</i><br><i>L1000</i> (Var. octave-band SPL at 1000 Hz)<br><i>L500</i> (Var. octave-band SPL at 500 Hz)<br><i>L250</i> (Var. octave-band SPL at 250 Hz)<br><i>L125</i> (Var. octave-band SPL at 125 Hz)<br><i>L63</i> (Var. octave-band SPL at 63 Hz) | proposed |
| 28-31 | Automated methods             | <i>LA</i> (LAeq)<br><i>PR</i> (Prominence ratio)<br><i>Fo</i> (Fundamental frequency)<br><i>AMfactor</i><br><i>DAM</i>                                                                                                                                                                                                                                                                                                          | (3–5)    |

**Table S1. Feature descriptions**



---

**Definitions:**

|                      |                              |
|----------------------|------------------------------|
| True positive (TP):  | Correct detection of AM      |
| False positive (FP): | Incorrect detection of AM    |
| True negative (TN):  | Correct detection of no AM   |
| False negative (FN): | Incorrect detection of no AM |

**Fundamental equations:**

|                                         |                                                                                                                                                                                |
|-----------------------------------------|--------------------------------------------------------------------------------------------------------------------------------------------------------------------------------|
| Recall (Sensitivity):                   | $recall = \frac{TP}{TP + FN}$                                                                                                                                                  |
| Precision:                              | $precision = \frac{TP}{TP + FP}$                                                                                                                                               |
| F1-score:                               | $F1score = 2 \frac{precision \times recall}{precision + recall}$                                                                                                               |
| Specificity:                            | $Specificity = \frac{TN}{TN + FP}$                                                                                                                                             |
| Accuracy:                               | $Accuracy = \frac{TP + TN}{N} \text{ where } N = TP + TN + FP + FN$                                                                                                            |
| Cohen's kappa:                          | $k = \frac{\frac{TP + TN}{TP + TN + FP + FN} - Pr(e)}{1 - Pr(e)} \text{ where}$ $Pr(e) = \frac{TP + FN}{N} \frac{TP + FP}{N} + (1 - \frac{TP + FN}{N})(1 - \frac{TP + FP}{N})$ |
| Matthews Correlation Coefficient (MCC): | $MCC = \frac{TP \times TN - FP \times FN}{\sqrt{(TP + FN)(TP + FP)(TN + FP)(TN + FN)}}$                                                                                        |

---

**Table S2. Evaluation metrics: Definitions and equations**

| Metric        | Mean [95%CI]      |
|---------------|-------------------|
| Recall        | 0.79 [0.66 0.92]  |
| FPR           | 0.14 [0.06 0.23]  |
| FNR           | 0.21 [0.008 0.34] |
| Specificity   | 0.86 [0.77 0.94]  |
| Precision     | 0.75 [0.6 0.89]   |
| FDR           | 0.25 [0.12 0.4]   |
| FOR           | 0.11 [0.03 0.19]  |
| NPV           | 0.89 [0.81 0.96]  |
| Accuracy      | 0.84 [0.76 0.91]  |
| F1-score      | 0.77 [0.66 0.87]  |
| MCC           | 0.65 [0.49 0.8]   |
| Cohen's kappa | 0.64 [0.48 0.8]   |

**Table S3. Inter-scorer agreement**

| Metric        | Out-of-bag validation value=<br>mean [95%CI] |
|---------------|----------------------------------------------|
| Recall        | 0.81 [0.8 0.82]                              |
| FPR           | 0.17 [0.17 0.18]                             |
| FNR           | 0.19 [0.18 0.20]                             |
| Specificity   | 0.83 [0.82 0.83]                             |
| Precision     | 0.7 [0.69 0.72]                              |
| FDR           | 0.3 [0.28 0.31]                              |
| FOR           | 0.11 [0.1 0.11]                              |
| NPV           | 0.89 [0.89 0.90]                             |
| Accuracy      | 0.82 [0.81 0.83]                             |
| F1-score      | 0.75 [0.74 0.76]                             |
| MCC           | 0.62 [0.60 0.63]                             |
| Cohen's kappa | 0.61 [0.60 0.63]                             |
| AUC           | 0.88 [0.88 0.89]                             |
| AUPRC         | 0.85 [0.84 0.86]                             |

**Table S4. Performance of the best classifier on the out-of-bag samples**

## References

1. K Hansen, B Zajamsek, C Hansen, Identification of low frequency wind turbine noise using secondary windscreens of various geometries. *Noise Control. Eng. J.* **62**, 69–82 (2014).
2. D Coles, HJ Bass, M Cand, Ioa am code - implementation of the core routine for am analysis from the ioa amwg (2017).
3. J Bass, et al., Institute of acoustics ioa noise working group ( wind turbine noise ) amplitude modulation working group final report a method for rating amplitude modulation in wind turbine noise version 1. (2016).
4. C Larsson, O Öhlund, Amplitude modulation of sound from wind turbines under various meteorological conditions. *J. Acoust. Soc. Am.* **135**, 67–73 (2014).
5. A Fukushima, et al., Study on the amplitude modulation of wind turbine noise: Part 1–physical investigation in *Internoise 2013*. (2013).
6. F Alías, JC Socoró, X Sevillano, A review of physical and perceptual feature extraction techniques for speech, music and environmental sounds. *Appl. Sci.* **6**, 143 (2016).
7. G Sharma, K Umapathy, S Krishnan, Trends in audio signal feature extraction methods. *Appl. Acoust.* **158**, 107020 (2020).
8. DA Bies, C Hansen, C Howard, *Engineering noise control*. (CRC press), (2017).
9. N Kelley, A proposed metric for assessing the potential of community annoyance from wind turbine low-frequency noise emissions, (Solar Energy Research Inst., Golden, CO (USA)), Technical report (1987).
10. Y Tokita, A Oda, K Shimizu, On the frequency weighting characteristics for evaluation of infra and low frequency noise in *Proceedings of INTER-NOISE 84 and NOISE-CON 84*. (Institute of Noise Control Engineering), pp. 917–920 (1984).
11. CH Hansen, CJ Doolan, KL Hansen, *Wind Farm Noise: Measurement, Assessment and Control*. (John Wiley Sons Ltd), 1 edition, (2017).
12. R Developments, Written scheme relating to condition 21 den brook wind farm. implementation of condition 20 for the identification of greater than expected amplitude modulation, (RES Developments Ltd.), Technical report (2014).
13. Nordtest, Nt-acou-112: Prominence of impulsive sounds and for adjustment of laeq (2002).
